# Supplementary material for: Shc1 cooperates with Frs2 and Shp2 to recruit Grb2 in FGF-induced lens development
Source: eLife journal article supplement (doi:10.7554/elife.103615), 2024-12-09
Supplement: fig5-data4 [file elife-103615-fig5-data4-v1.zip]

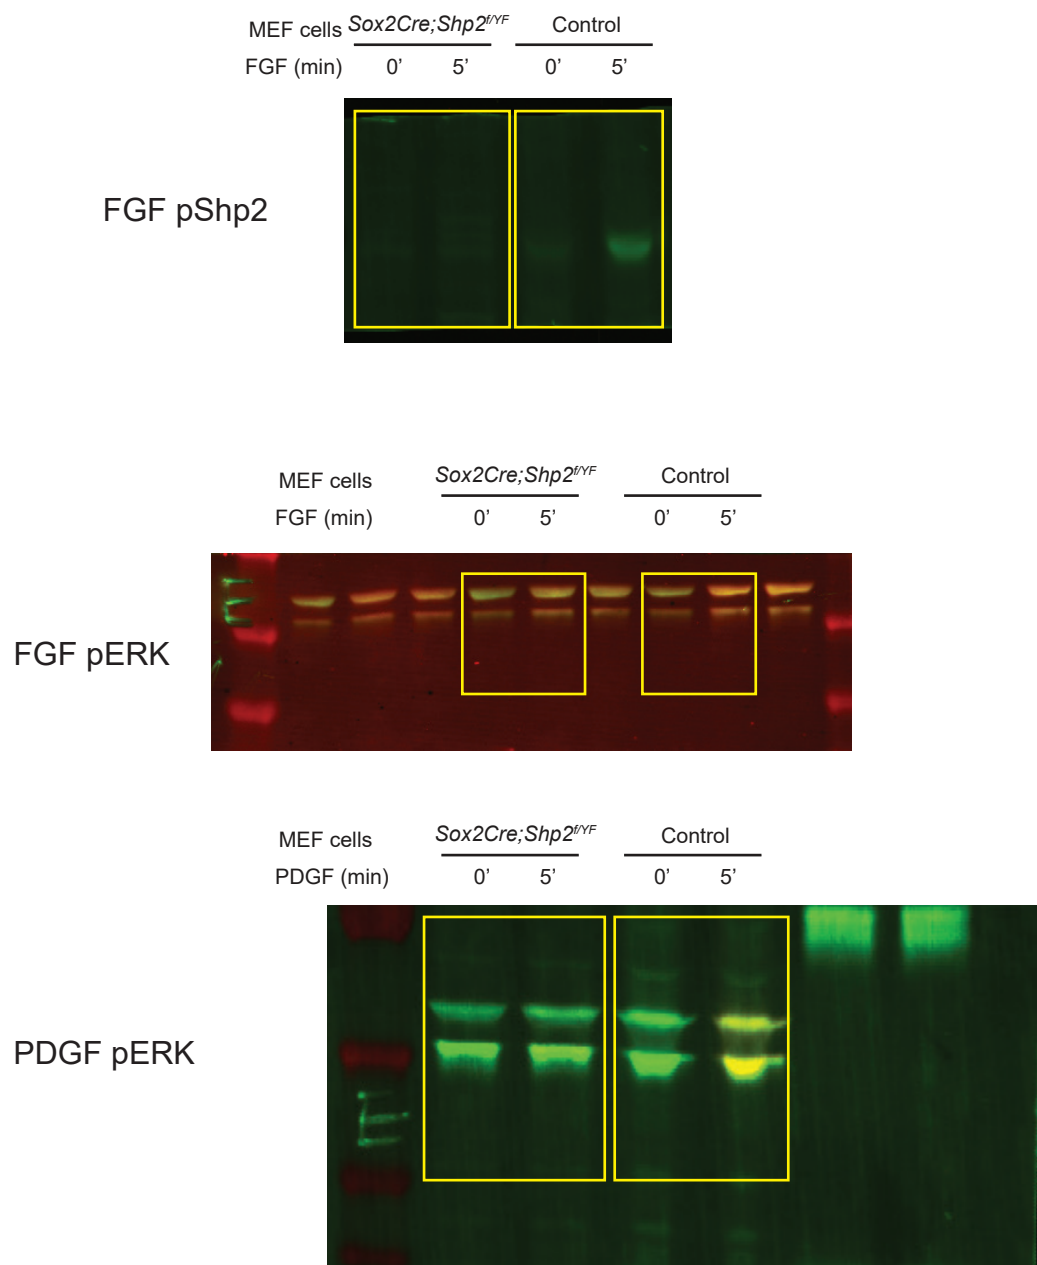

**Figure 5, Source Data 4.** Original membranes corresponding to Figure 5, panel H. The relevant lanes are outlined in yellow.
