# Supplementary material for: Shc1 cooperates with Frs2 and Shp2 to recruit Grb2 in FGF-induced lens development
Source: eLife journal article supplement (doi:10.7554/elife.103615), 2024-12-09
Supplement: fig6-data2 [file elife-103615-fig6-data2-v1.zip]

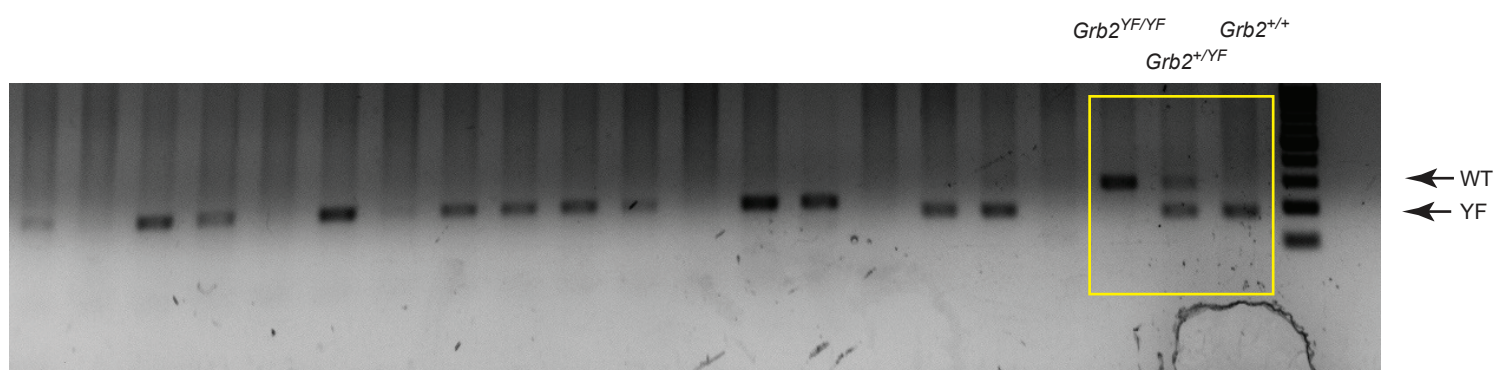

**Figure 6, Source Data 1.** Original membranes corresponding to Figure 6, panel C. The relevant lanes are outlined in yellow.
